# Supplementary material
Source: publisher figshare collection journal article supplement (https://asha.figshare.com/articles/dataset/_/13289330)
Supplement: Supplementary file 1 [file 1]

**Supplemental Material S1.** *English and Spanish vocabulary items used in the experimental task*  
*Note.*

|     | <i>English</i> | <i>Spanish</i> |     | <i>English</i> | <i>Spanish</i> |
|-----|----------------|----------------|-----|----------------|----------------|
| 1.  | arm            | brazo          | 22. | hand           | mano           |
| 2.  | axe            | hacha          | 23. | hat            | sombrero       |
| 3.  | backpack       | mochilla       | 24. | heart          | corazón        |
| 4.  | balloon        | globo          | 25. | helmet         | casco          |
| 5.  | bed            | cama           | 26. | horse          | caballo        |
| 6.  | bench          | banca          | 27. | house          | casa           |
| 7.  | bone           | hueso          | 28. | king           | rey            |
| 8.  | book           | libro          | 29. | magnet         | imán           |
| 9.  | bridge         | punto          | 30. | mushroom       | hongo          |
| 10. | broom          | escoba         | 31. | nail           | clavo          |
| 11. | butterfly      | mariposa       | 32. | pen            | pluma          |
| 12. | cheese         | queso          | 33. | pencil         | lápiz          |
| 13. | church         | iglesia        | 34. | pillow         | almohada       |
| 14. | clown          | payaso         | 35. | rain           | lluvia         |
| 15. | couch          | sillón         | 36. | rock           | piedra         |
| 16. | door           | puerta         | 37. | rocket         | cohete         |
| 17. | dress          | vestido        | 38. | shovel         | pala           |
| 18. | drum           | tambor         | 39. | table          | mesa           |
| 19. | finger         | dedo           | 40. | wheel          | rueda          |
| 20. | flag           | bandera        | 41. | wig            | peluca         |
| 21. | frog           | rana           | 42. | witch          | bruja          |

*Note.* Vocabulary items come from Gross and Kaushanskaya (2015), obtained from the dataset of the International Picture-Naming Project from Bates et al. (2003) , available at: <http://crl.ucsd.edu/experiments/ipnp/71gpno.html>.
