# Supplementary material
Source: publisher figshare collection journal article supplement (https://asha.figshare.com/articles/dataset/_/13289330)

**Supplemental Material S2.** Screenshots of the AAC device displays containing sample vocabulary layouts in Spanish and English.

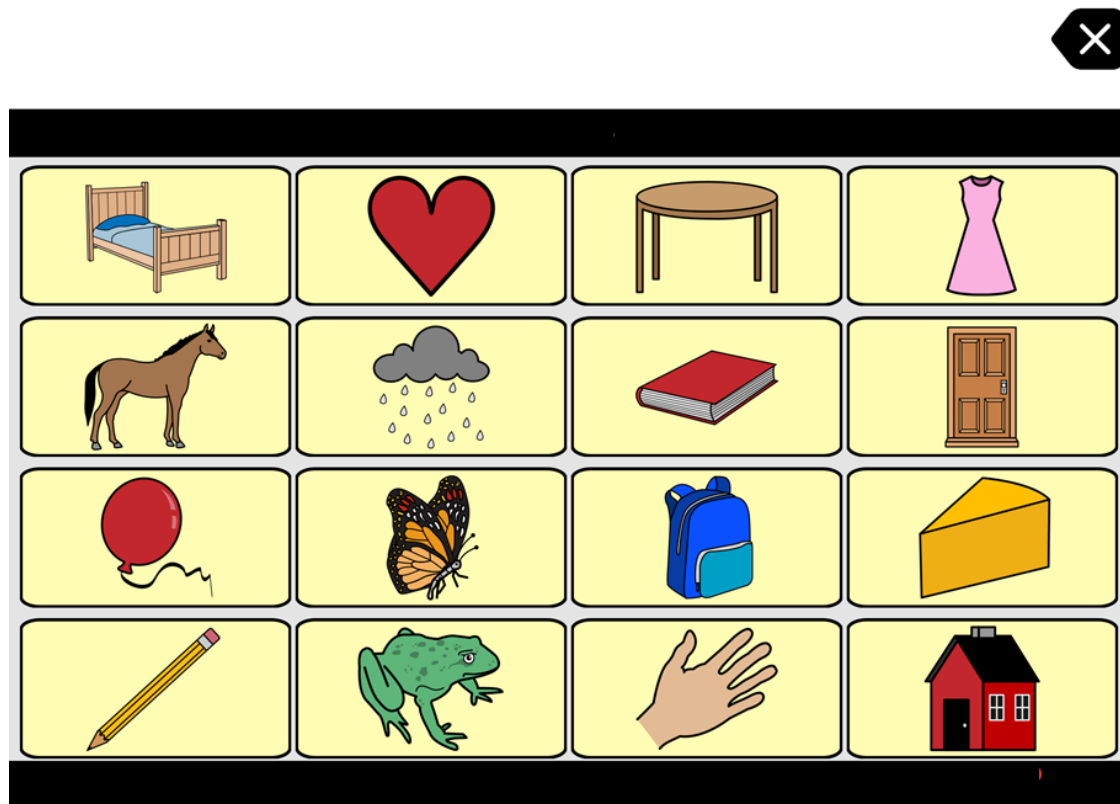

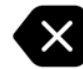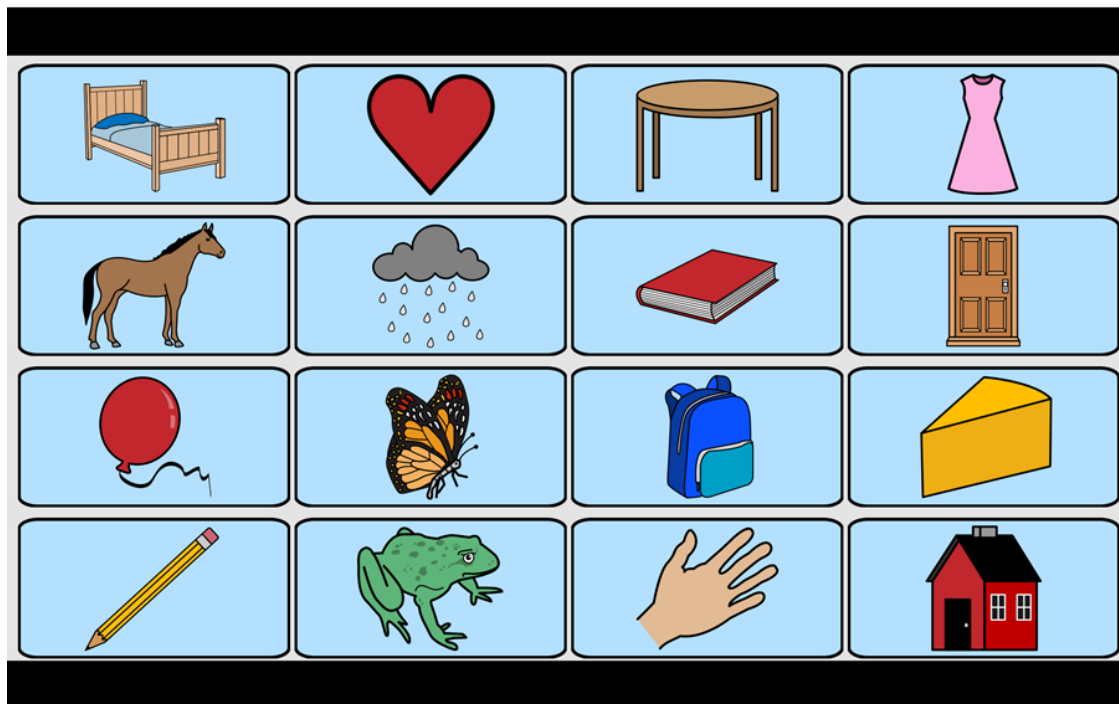

Supplement: Supplementary file 2 [file 1]
