# Supplementary material
Source: publisher figshare collection journal article supplement (https://asha.figshare.com/articles/dataset/_/13289330)
Supplement: Supplementary file 3 [file 1]

**Supplemental Material S3.** Example target words, set up, and prompts for the experimental task.

| Script              | <i>Now we’re going to help José* to talk using the pictures on the tablets. José speaks both English and Spanish, but his friend Sara** (present Sara doll) only understands Spanish. José can talk to Sara in Spanish using this tablet here (point to Spanish SGD). José has another friend called Freddy***. Here’s Freddy (present Freddy doll). But Freddy only understands English. José can talk to Freddy using this tablet here (point to English SGD). Let’s help José talk to his friends!</i> |                                                          |
|---------------------|-----------------------------------------------------------------------------------------------------------------------------------------------------------------------------------------------------------------------------------------------------------------------------------------------------------------------------------------------------------------------------------------------------------------------------------------------------------------------------------------------------------|----------------------------------------------------------|
| Example Target Word | Set-Up                                                                                                                                                                                                                                                                                                                                                                                                                                                                                                    | Spoken Prompt                                            |
| House (English)     | English-understanding doll (Freddy) placed behind iPads.<br>Bilingual doll (José) placed next to child.                                                                                                                                                                                                                                                                                                                                                                                                   | “Here comes Freddy, José wants to say... <i>house</i> .” |
| Mano (Spanish)      | Spanish-understanding doll (Sara) placed behind iPads.<br>Bilingual doll (José) placed next to child.                                                                                                                                                                                                                                                                                                                                                                                                     | “Aquí viene Sara, José quiere decir... <i>mano</i> .”    |

*Note.* Depending on the child’s language dominance, the examiner read a script in either English or Spanish to present the task. \*José – name of “bilingual doll, \*\*Sara – name of “Spanish understanding doll”, \*\*\*Freddy – name of “English understanding” doll.
